# Supplementary material for: Structural analysis of the genome of breast cancer cell line ZR-75-30 identifies twelve expressed fusion genes
Source: PubMed Central journal article supplement (PMC3548764; doi:10.1186/1471-2164-13-719), 2012-12-22
Supplement: 1471-2164-13-719-S8.pdf [file 1471-2164-13-719-S8.pdf]

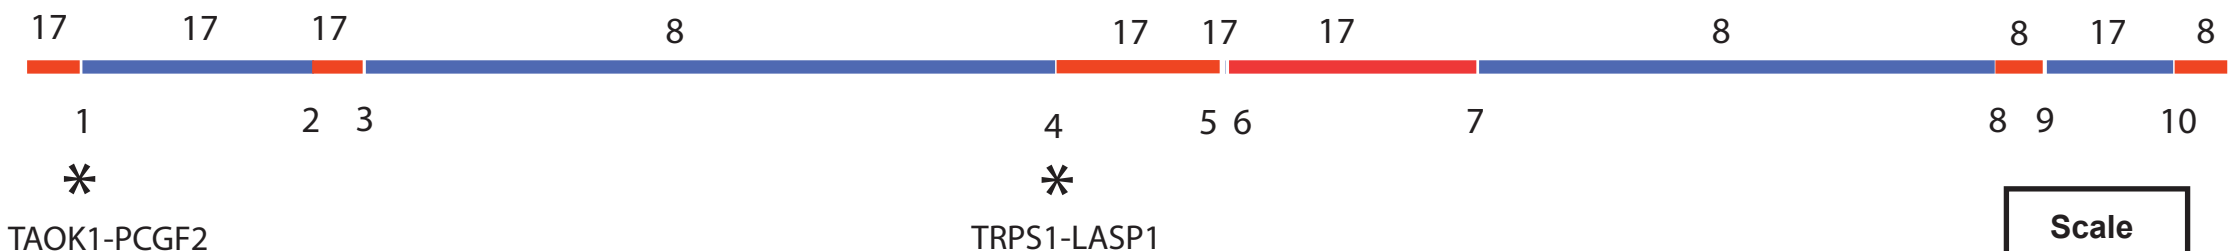

|          |     | Solexa reads (Hg19) |            |     |     |              |            |     |     |            |              |
|----------|-----|---------------------|------------|-----|-----|--------------|------------|-----|-----|------------|--------------|
| Junction | Chr | Node 1 start        | node 1 end | Dir | Chr | Node 2 start | Node 2 end | Dir | SV  | Supp reads | Confirmation |
| 1        | 17  | 36896659            | 36897109   | +   | 17  | 27777987     | 27778098   | +   | INV | 8          | PCR          |
| 2        | 17  | 27403809            | 27404233   | -   | 17  | 47560594     | 47561036   | +   | INS | 22         | snp6         |
| 3        | 17  | 47480427            | 47480775   | -   | 8   | 117735269    | 117735665  | +   | DIF | 16         | snp6         |
| 4        | 8   | 116623415           | 116623774  | -   | 17  | 37016564     | 37016943   | -   | DIF | 7          | PCR          |
| 5        | 17  | 37280837            | 37281318   | +   | 17  | 28100421     | 28101123   | -   | INS | 23         | PCR+snp6     |
| 6        | 17  | 28100946            | 28101124   | +   | 17  | 35142597     | 35142819   | -   | DEL | 13         | snp6         |
| 7        | 17  | 35544634            | 35545063   | +   | 8   | 109665984    | 109666458  | -   | DIF | 12         | PCR+snp6     |
| 8        | 8   | 110498209           | 110498651  | +   | 8   | 102603779    | 102604269  | +   | INV | 66         | PCR+snp6     |
| 9        | 8   | 102526951           | 102527414  | -   | 17  | 26664041     | 26664498   | -   | DIF | 103        | snp6         |
| 10       | 17  | 26868545            | 26868937   | +   | 8   | 143340183    | 143340539  | +   | DIF | 23         | snp6         |

**Additional file 8: One possible assembly of ten junctions in the 8;17 amplicon of ZR7530.** Segments of chromosomes 8 and 17 are shown to scale, in alternating red and blue for ease of visualisation. Two expressed, in-frame fusions (marked ✱) are shown. Junction numbers 1-10 are marked and the corresponding paired-end reads (Hg19) are shown in the table. All individual junctions were confirmed by genomic PCR or matching to a snp6 copy number step.
